# Supplementary material
Source: PubMed Central journal article supplement (PMC9829245)

**Supplementary Table 1: Flow cytometry antibodies and flouochromes.**

| <b>Marker</b> | <b>Flourochrome</b> | <b>Lot#</b> | <b>Manufacturer</b> | <b>Dilution</b> |
|---------------|---------------------|-------------|---------------------|-----------------|
| CD20          | Pacific Blue        | 2H7         | BioLegend           | 0.01            |
| CD44          | APC-H7              | G44-26      | BD                  | 0.025           |
| CD10          | PE-Cy7              | HI10a       | BD                  | 0.05            |
| CD38          | FITC                | NA          | Cytognos            | 0.03            |
| CD27          | APC                 | L128        | BD                  | 0.03            |
| CD184 / CXCR4 | PE                  | NA          | BD                  | 0.1             |
| IgD           | PE                  | NA          | Miltenyi            | 0.03            |

**Supplementary Table 2: sgRNA sequences used in CRISPRi experiments.**

| sgRNA ID | Target   | Target Alias          | Species | Source                                                  | Insert Sequence           |
|----------|----------|-----------------------|---------|---------------------------------------------------------|---------------------------|
| SG347    | POU2AF1  | OCAB                  | human   | Cloned using gRNA sequences from Gilbert et al. library | CACCGGCAAGCGGTGGCTCCACTGG |
| SG348    | POU2AF1  | OCAB                  | human   | Cloned using gRNA sequences from Gilbert et al. library | CACCGGATTAAGAAGCCAAACTGT  |
| SG349    | POU2AF1  | OCAB                  | human   | Cloned using gRNA sequences from Gilbert et al. library | CACCGGGCTTCTTTAATGTGAGACC |
| SG350    | POU2AF1  | OCAB                  | human   | Cloned using gRNA sequences from Gilbert et al. library | CACCGGGGAGAAACCAGCCTGTCAG |
| SG351    | POU2AF1  | OCAB                  | human   | Cloned using gRNA sequences from Gilbert et al. library | CACCGGACCCAAGCGAGTGCCAGCG |
| SG81     | Control  | non-targeting control | human   | Cloned using gRNA sequence from GeckoV2 library         | CACCGACGGAGGCTAAGCGTCGCAA |
| SG82     | Control  | non-targeting control | human   | Cloned using gRNA sequence from GeckoV2 library         | CACCGCGCTTCGGCGGCCGTTCAA  |
| SG282    | BCL6-TSS | BCL6-TSS              | human   | selected from BCL6-LCR screening library                | CACCGGCACCAGCGCAACAGCGG   |
| SG283    | BCL6-TSS | BCL6-TSS              | human   | selected from BCL6-LCR screening library                | CACCGACCAGCGCAACAGCGCGG   |
| SG284    | OCT2-E1  | enh1                  | human   | selected from BCL6-LCR screening library                | CACCGAGAAAGGTGTGGGCCAGGGC |
| SG285    | OCT2-E1  | enh1                  | human   | selected from BCL6-LCR screening library                | CACCGATGTTCTATACAGCAATTAG |
| SG298    | desert   | desert1               | human   | selected from BCL6-LCR screening library                | CACCGACTGGCTGAGGATGAAAGG  |
| SG299    | desert   | desert1               | human   | selected from BCL6-LCR screening library                | CACCGCCTCTTCTTGCTTCCACTT  |

Uncropped immunoblots related to Extended data Figure 3j

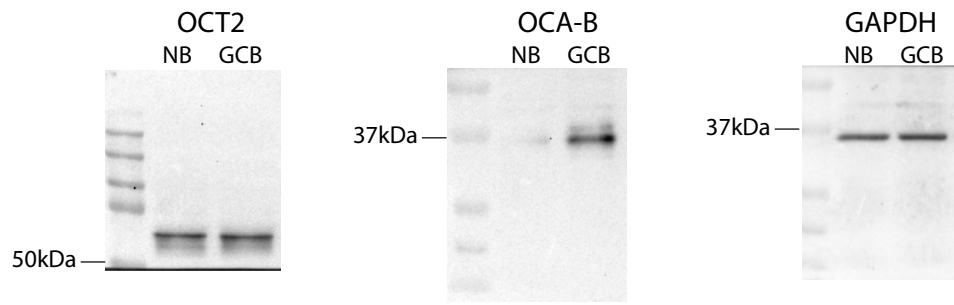

Supplement: NIHMS1848792-supplement-1.pdf [file NIHMS1848792-supplement-1.pdf]
